# Supplementary material
Source: publisher site journal article supplement (https://www.dovepress.com/article/237330)
Supplement: Supplementary file 1 [file get_supplementary_file.php]

Supplementary Figure 1


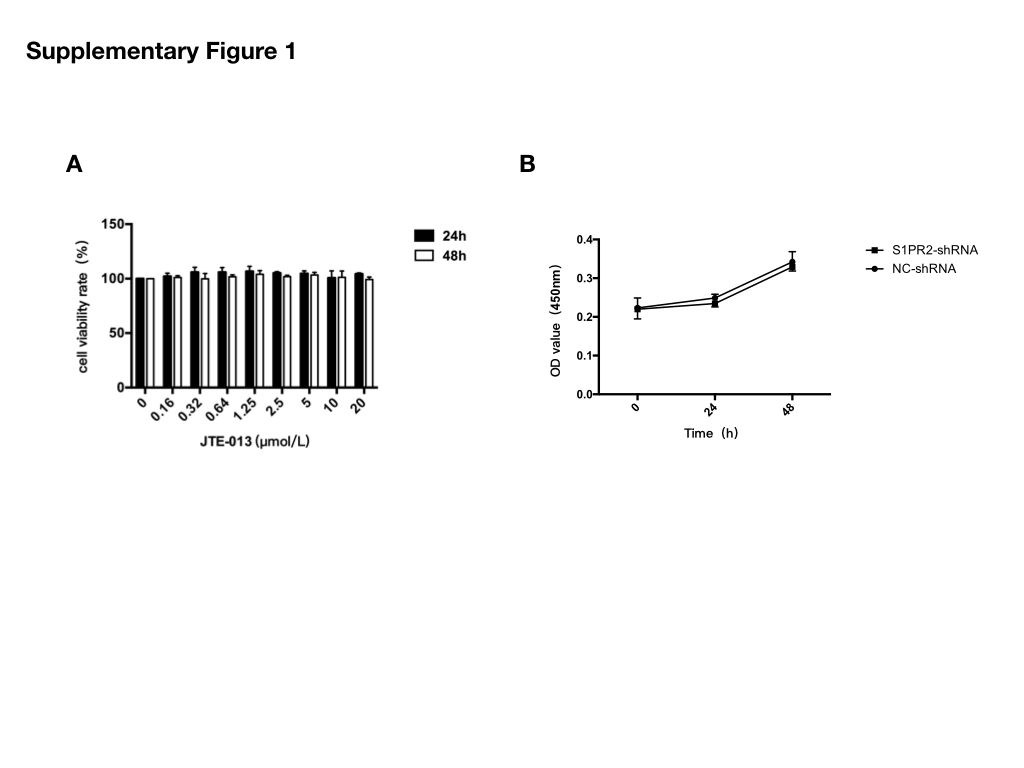
Supplementary Figure 1: S1PR2 inhibition have no detectable effects on cell proliferation in U266 cells. A. CCK8 assay was performed to detect the U266 cell proliferation ability after treatment with various does of JTE-013 for 24h and 48h. B. The effects of S1PR2 on cell proliferation were analyzed by CCK-8 assay in S1PR2-shRNA and NC-shRNA U266 cells at 0h, 24h and 48h.
